# Supplementary material for: Strategies and Best Practices That Enhance the Physical Activity Levels of Undergraduate University Students: A Systematic Review
Source: MDPI journal article supplement (doi:10.3390/ijerph21020173), 2024-02-01
Supplement: s1 [file s1]

# Supplementary File S1: Database search strategies

| Database                 | Search Terms                                                                                                                                                                                                                                               |
|--------------------------|------------------------------------------------------------------------------------------------------------------------------------------------------------------------------------------------------------------------------------------------------------|
| PubMed                   | ((((((((((physical activity) AND (exercise)) OR (strategies)) OR (best practices)) OR (interventions)) OR (programmes)) OR (programs)) OR (approaches)) AND (young adults)) OR (university students)) OR (college students)) OR (undergraduate students)). |
| Science Direct           | Title and Abstract<br>((physical activity OR exercise) AND (strategies OR best practices OR interventions OR programmes OR programs OR approaches) AND (young adults OR university students OR college students OR undergraduate students)).               |
| Academic Search Complete | Title and Abstract<br>((physical activity OR exercise) AND (strategies OR best practices OR interventions OR programmes OR programs OR approaches) AND (young adults OR university students OR college students OR undergraduate students)).               |
| ERIC                     | Title and Abstract<br>((physical activity OR exercise) AND (strategies OR best practices OR interventions OR programmes OR programs OR approaches) AND (young adults OR university students OR college students OR undergraduate students)).               |
| Web of Science           | Title and Abstract<br>((physical activity OR exercise) AND (strategies OR best practices OR interventions OR programmes OR programs OR approaches) AND (young adults OR university students OR college students OR undergraduate students)).               |
| CINAHL                   | Title and Abstract<br>((physical activity OR exercise) AND (strategies OR best practices OR interventions OR programmes OR programs OR approaches) AND (young adults OR university students OR college students OR undergraduate students)).               |
| Sage                     | Title and Abstract<br>((physical activity OR exercise) AND (strategies OR best practices OR interventions OR programmes OR programs OR approaches) AND (young adults OR university students OR college students OR undergraduate students)).               |
| SportDiscus              | Title and Abstract<br>((physical activity OR exercise) AND (strategies OR best practices OR interventions OR programmes OR programs OR approaches) AND (young adults OR university students OR college students OR undergraduate students)).               |
| OpenGrey                 | ((physical activity OR exercise) AND (strategies OR best practices OR interventions OR programmes OR programs OR approaches) AND (young adults OR university students OR college students OR undergraduate students)).                                     |

ERIC = Education Resources Information Center

CINAHL = Cumulated Index to Nursing and Allied Health Literature
