# Supplementary material for: Strategies and Best Practices That Enhance the Physical Activity Levels of Undergraduate University Students: A Systematic Review
Source: MDPI journal article supplement (doi:10.3390/ijerph21020173), 2024-02-01
Supplement: s1 [file s1]

## Supplementary File S2: Data extraction form

[illegible]
