# Supplementary material for: Strategies and Best Practices That Enhance the Physical Activity Levels of Undergraduate University Students: A Systematic Review
Source: MDPI journal article supplement (doi:10.3390/ijerph21020173), 2024-02-01
Supplement: s1 [file s1]

**Table S1: Critical Appraisal of the quantitative studies reviewed (adapted from CASP) (N = 8)**

| <b>Author(s)</b>      | <b>1. Was the study conducted at a university/college?</b> | <b>2. Is the sampling process clearly stated? (non-probability, probability)?</b> | <b>3. Was the measurement tool valid and reliable?</b> | <b>4. Was the data a primary source?</b> | <b>5. Were the dropout responses reported?</b> | <b>6. Was ethical approval obtained?</b> | <b>7. Were the quantitative methods appropriate?</b> | <b>8. Was the research design correct to address the research question?</b> | <b>Final Score (□/8)</b> | <b>Total (%)</b> |
|-----------------------|------------------------------------------------------------|-----------------------------------------------------------------------------------|--------------------------------------------------------|------------------------------------------|------------------------------------------------|------------------------------------------|------------------------------------------------------|-----------------------------------------------------------------------------|--------------------------|------------------|
| <b>Mo 2019</b>        | Yes                                                        | Yes                                                                               | Yes                                                    | Yes                                      | Yes                                            | Yes                                      | Yes                                                  | Yes                                                                         | 7                        | <b>100</b>       |
| <b>Al-Eisa 2016</b>   | Yes                                                        | Yes                                                                               | Yes                                                    | Yes                                      | Yes                                            | Yes                                      | Yes                                                  | Yes                                                                         | 8                        | <b>100</b>       |
| <b>Roure 2020</b>     | Yes                                                        | Yes                                                                               | Yes                                                    | Yes                                      | No                                             | Yes                                      | Yes                                                  | Yes                                                                         | 6                        | <b>87.5</b>      |
| <b>Marens 2021</b>    | Yes                                                        | No                                                                                | Yes                                                    | Yes                                      | No                                             | Yes                                      | Yes                                                  | Yes                                                                         | 8                        | <b>75</b>        |
| <b>Worobetz 2020</b>  | Yes                                                        | No                                                                                | Yes                                                    | Yes                                      | No                                             | Yes                                      | Yes                                                  | Yes                                                                         | 6                        | <b>75</b>        |
| <b>Todorovic 2019</b> | Yes                                                        | No                                                                                | No                                                     | Yes                                      | Yes                                            | Yes                                      | Yes                                                  | Yes                                                                         | 6                        | <b>75</b>        |
| <b>Zhang 2018</b>     | Yes                                                        | Yes                                                                               | Yes                                                    | Yes                                      | No                                             | Yes                                      | Yes                                                  | No                                                                          | 6                        | <b>75</b>        |
| <b>Yang 2014</b>      | Yes                                                        | No                                                                                | Yes                                                    | Yes                                      | No                                             | Yes                                      | Yes                                                  | Yes                                                                         | 6                        | <b>75</b>        |
