# Supplementary material for: Strategies and Best Practices That Enhance the Physical Activity Levels of Undergraduate University Students: A Systematic Review
Source: MDPI journal article supplement (doi:10.3390/ijerph21020173), 2024-02-01
Supplement: s1 [file s1]

**Table S2: Critical appraisal of randomised controlled studies (adapted from the RE-AIM framework) (N = 3)**

|                                                                                                                                           | <b>Cavallo<br/>2012</b> | <b>St Quinton<br/>2021</b> | <b>Tulasiram<br/>2021</b> |
|-------------------------------------------------------------------------------------------------------------------------------------------|-------------------------|----------------------------|---------------------------|
| <b>REACH</b>                                                                                                                              |                         |                            |                           |
| 1. Does the article indicate who the intervention is intended for (inclusion criteria)?                                                   | Yes                     | Yes                        | Yes                       |
| 2. Does the article report on exclusion criteria?                                                                                         | Yes                     | Yes                        | Yes                       |
| 3. Does the article report on the representativeness of the target population? (gender)?                                                  | Yes                     | Yes                        | Yes                       |
| 4. Does the article report on the participation rate?                                                                                     | Yes                     | Yes                        | Yes                       |
| 5. Are there reports on indirect beneficiaries?                                                                                           | No                      | No                         | No                        |
| <b>EFFICACY</b>                                                                                                                           |                         |                            |                           |
| 1. Did the intervention achieve the intended objectives?                                                                                  | No                      | Yes                        | Yes                       |
| 2. Does the article report on the limitations of the intervention?                                                                        | Yes                     | Yes                        | Yes                       |
| 3. Are there reports of attrition (number of people who completed the programme)?                                                         | Yes                     | Yes                        | Yes                       |
| 4. Does the article include recommendations to improve the intervention?                                                                  | Yes                     | Yes                        | Yes                       |
| 5. Does the article include recommendations for practice?                                                                                 | Yes                     | Yes                        | Yes                       |
| <b>ADOPTION</b>                                                                                                                           |                         |                            |                           |
| 1. Is the setting described in terms of country and place of intervention (e.g., university/college setting)?                             | Yes                     | Yes                        | Yes                       |
| 2. Is the context described (low socioeconomic, rural, etc.)?                                                                             | No                      | No                         | No                        |
| 3. Is reference made to how accessible the place of intervention was to the participants (e.g., university/college setting.)?             | Yes                     | Yes                        | Yes                       |
| 4. Are there reports on the adoption of the intervention by the participants (e.g., were they open to the intervention, resistant, etc.)? | Yes                     | Yes                        | Yes                       |
| 5. Are there reports on consultation or partnering with the university/college prior to the intervention?                                 | Yes                     | Yes                        | Yes                       |
| <b>IMPLEMENTATION</b>                                                                                                                     |                         |                            |                           |
| 1. Are there reports of resources required to conduct the intervention?                                                                   | Yes                     | Yes                        | Yes                       |
| 2. Are there reports of who did the intervention (e.g., social worker, teacher, etc.)?                                                    | Yes                     | No                         | Yes                       |
| 3. Are the duration and frequency of the intervention described?                                                                          | Yes                     | Yes                        | Yes                       |
| 4. Is training or experience required to implement the intervention?                                                                      | Yes                     | No                         | Yes                       |
| 5. Did participants evaluate the intervention?                                                                                            | Yes                     | No                         | No                        |
| <b>MAINTENANCE</b>                                                                                                                        |                         |                            |                           |
| 1. Does the article report on long-term effects of the intervention (e.g., after 6, 12, etc. months)?                                     | No                      | No                         | No                        |

|                                                                                                                                                |           |           |           |
|------------------------------------------------------------------------------------------------------------------------------------------------|-----------|-----------|-----------|
| 2. Does the article report on indicators used for intervention follow-up?                                                                      | Yes       | Yes       | Yes       |
| 3. Are there reports on the attrition rates (number of those who completed the intervention vs. the number who participated in the follow-up)? | Yes       | Yes       | No        |
| 4. Are there reports of relapse?                                                                                                               | No        | No        | No        |
| 5. Is the method of follow-up indicated (e.g., telephone calls, interviews, questionnaires, etc.)?                                             | Yes       | Yes       | No        |
| <b>Final Score (□/25)</b>                                                                                                                      | <b>20</b> | <b>18</b> | <b>18</b> |
| <b>Percentage (%)</b>                                                                                                                          | <b>80</b> | <b>72</b> | <b>72</b> |
