# Supplementary material for: Strategies and Best Practices That Enhance the Physical Activity Levels of Undergraduate University Students: A Systematic Review
Source: Int J Environ Res Public Health. 2024 Feb 1;21(2):173. doi: 10.3390/ijerph21020173 (PMC10888190; doi:10.3390/ijerph21020173)
Supplement: Supplementary file 1 [file ijerph-21-00173-s001.zip]

Archive with 4 entries (4 files):
- Supplementary File S1_ Database Search Strategies.pdf
- Supplementary File S2_Data Extraction Form.pdf
- Supplementary Table S1_ Critical appraisal of quantitative studies - Copy.pdf
- Supplementary Table S2_ Critical appraisal of randomised controlled studies.pdf
